# Supplementary material
Source: Springer Nature journal article supplement (https://www.springermedizin.de/resource/supplementary/12967_2013_1678_MOESM2_ESM.pdf/9574632)

## A SMARCB1/INI1 (TMAs)

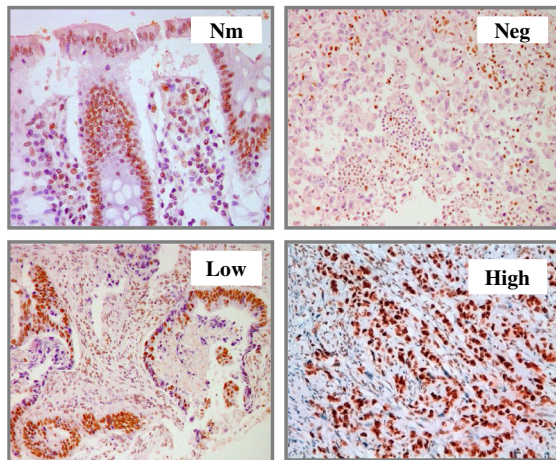

## B

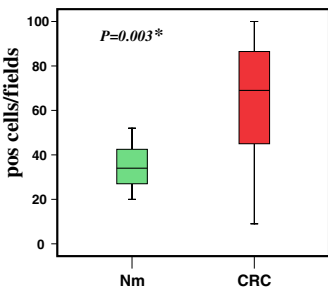

## C

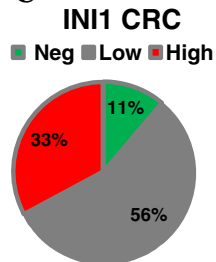

## D

## SMARCB1/INI1 (WB)

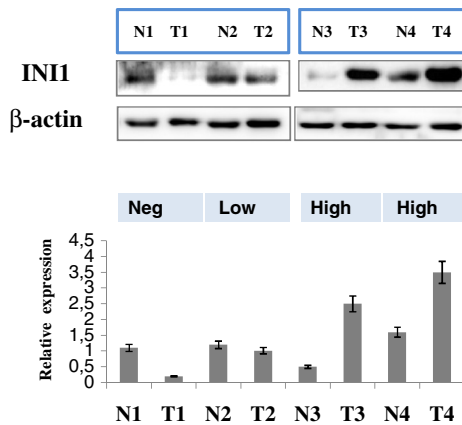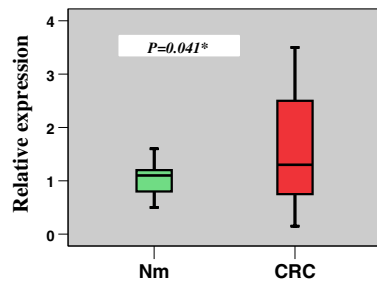

Supplement: MOESM2 [file 9574632]
